# Supplementary material
Source: Royal Society of Chemistry journal article supplement (doi:10.1039/d6nj00968a)
Supplement: d6nj00968a1.pdf [file d6nj00968a1.pdf]

1     **Engineering active sites at hydrotalcite-derived Cu-ZnO interaction**

2                     **for promoting CO<sub>2</sub> hydrogenation to methanol**

3 Ying Yang<sup>1</sup>, Peixiang Shi<sup>1,\*</sup>, Zhiqiang Yan<sup>1</sup>, Zhaohui Liu<sup>1</sup>, Yanchun Li<sup>1</sup>, Hongyan

4 Ban<sup>1</sup>, Congming Li<sup>1,\*</sup>

5 <sup>1</sup> State Key Laboratory of Clean and Efficient Coal Utilization, College of Chemistry

6 and Chemical Engineering, Taiyuan University of Technology, Taiyuan 030024,

7 China.

8

9

10

11                     Corresponding authors: Peixiang Shi; Congming Li

12 Email address: frankshi926@126.com; licongming0523@163.com

13

1 **Catalytic tests:**

2 Calculation formula for CO<sub>2</sub> conversion ( $X_{CO_2}$ ) rate:

$$X_{CO_2} = \left( 1 - \frac{A_{out(CO_2)}/A_{out(Ar)}}{A_{in(CO_2)}/A_{in(Ar)}} \right) \times 100\%$$

3  
4 where  $A_{in(CO_2)}$  and  $A_{in(Ar)}$  are the TCD peak area of CO<sub>2</sub> and Ar before reaction,

5  $A_{out(CO_2)}$  and  $A_{out(Ar)}$  are the TCD peak area of CO<sub>2</sub> and Ar after reaction.

6

7 The formula for calculating the selectivity of CO and CH<sub>3</sub>OH:

$$S_{CO} = \frac{A_{out(CO)}/A_{out(Ar)} \times f_{CO/Ar}}{\left( A_{in(CO_2)}/A_{in(Ar)} - A_{out(CO_2)}/A_{out(Ar)} \right) \times f_{CO_2/Ar}} \times 100\%$$

8

$$S_{CH_3OH} = \left( \frac{A_{CH_3OH} \times f_{CH_3OH}}{\left( A_{in(CO_2)}/A_{in(Ar)} - A_{out(CO_2)}/A_{out(Ar)} \right) \times f_{CO_2/Ar}} \right) \times 100\%$$

9

10 where  $A_{out(CO)}$  and  $A_{CH_3OH}$  is the peak area of CO and CH<sub>3</sub>OH, respectively.  $f_{CO/Ar}$ ,

11  $f_{CO_2/Ar}$ , and  $f_{CH_3OH}$  are the calibration factor of CO, CO<sub>2</sub>, and CH<sub>3</sub>OH.

12

13

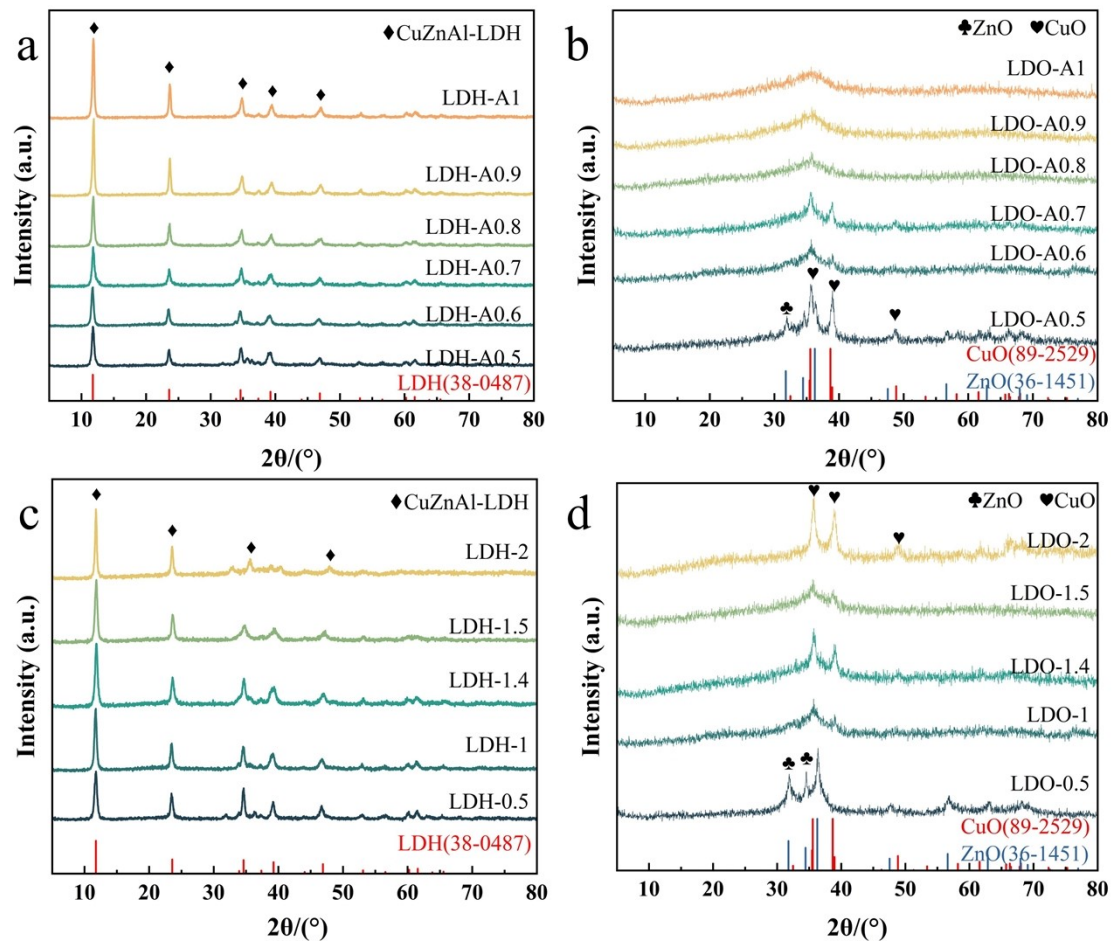

1  
 2 Fig. S1. XRD patterns of the (a) the precursor of LDH-Ax; (b) calcined LDO-Ax; (c)  
 3 the precursor of LDH-y; (d) calcined LDO-y.

4

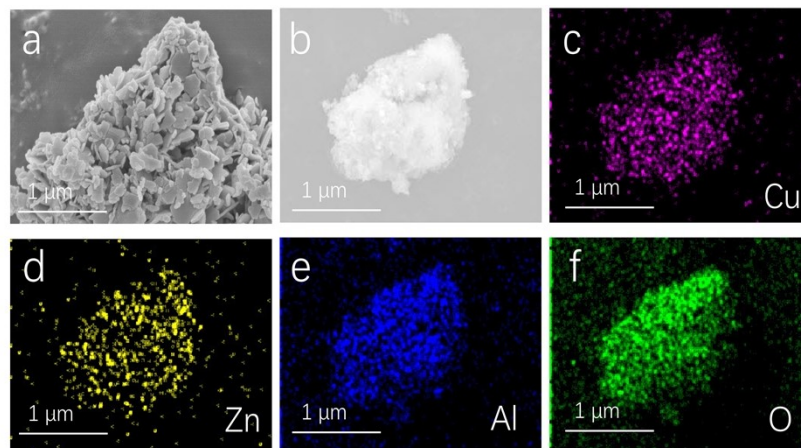

5  
 6 Fig. S2. (a) SEM images and (b-f) EDS element mapping of LDO-1.4.

7

1 Table S1. Actual catalyst compositions determined from ICP of the LDO-y and CZA-  
 2 1.4 catalysts.

| Catalyst | Cu(mol%) | Zn(mol%) | Al(mol%) | (Cu+Zn)/Al(mol%) | Cu:Zn:Al        |
|----------|----------|----------|----------|------------------|-----------------|
| LDO-0.5  | 18.44    | 58.54    | 23.02    | 3.34             | 0.481:1.527:0.6 |
| LDO-1    | 38.13    | 40.11    | 21.76    | 3.59             | 1.051:1.106:0.6 |
| LDO-1.4  | 52.91    | 24.46    | 22.63    | 3.42             | 1.403:0.649:0.6 |
| LDO-1.5  | 58.03    | 19.61    | 22.36    | 3.47             | 1.527:0.526:0.6 |
| LDO-2    | 78.07    | 0        | 21.93    | 3.56             | 2.136:0:0.6     |
| CZA-1.4  | 52.11    | 24.89    | 22.31    | 3.45             | 1.401:0.669:0.6 |

3  
 4

5 Table S2. Summary of N<sub>2</sub>-physisorption, crystallite size and average particle size of  
 6 the LDO-1.4 and CZA-1.4 catalysts.

| Catalyst | S <sub>BET</sub> <sup>a</sup> (m <sup>2</sup> /g) | Pore volume <sup>b</sup> (cm <sup>3</sup> /g) | Pore diameter <sup>c</sup> (nm) |
|----------|---------------------------------------------------|-----------------------------------------------|---------------------------------|
| LDO-1.4  | 26.23                                             | 0.36                                          | 35.43                           |
| CZA-1.4  | 67.75                                             | 0.84                                          | 32.42                           |

7 a Specific surface area was calculated using the BET method.

8 b Cumulative pore volume was determined from desorption branches via the BJH  
 9 method.

10 c Pore size distribution was derived from desorption data based on the BJH method.

11

12

13 Table S3. Surface copper species content of prereduced LDO-1.4 and CZA-1.4.

| Catalyst | Kintic energy and surface copper species percentage (eV/%) |                 |
|----------|------------------------------------------------------------|-----------------|
|          | Cu <sup>+</sup>                                            | Cu <sup>0</sup> |
| LDO-1.4  | 914.3(57.5%)                                               | 917.4(42.5%)    |
| CZA-1.4  | 914.5(66.9%)                                               | 917.7(33.1%)    |

14

15

16 Table S4. Surface zinc species content of prereduced LDO-1.4 and CZA-1.4.

| Catalyst | Binding energy and surface zinc species percentage (eV/%) |                  |
|----------|-----------------------------------------------------------|------------------|
|          | Zn <sup>2+</sup>                                          | Zn <sup>δ+</sup> |
| LDO-1.4  | 499.1(68.4%)                                              | 495.9(31.6%)     |
| CZA-1.4  | 498.8(68.3%)                                              | 495.7(31.7%)     |

17

1

2 Table S5. Surface oxygen species content of prereduced LDO-y and CZA-1.4.

| Catalyst | Binding energy and surface oxygen species percentage (eV/%) |                |
|----------|-------------------------------------------------------------|----------------|
|          | O <sub>L</sub>                                              | O <sub>V</sub> |
| LDO-1.4  | 530.3(18.7%)                                                | 531.7(81.3%)   |
| CZA-1.4  | 530.0(29.5%)                                                | 531.6(70.5%)   |

3

4

5 Table S6. The maximum temperature and amount of CO<sub>2</sub> and H<sub>2</sub> desorption over  
6 prereduced LDO-1.4 and CZA-1.4 catalysts.

| Catalyst | CO <sub>2</sub> -TPD(μmol/g) |            |       | H <sub>2</sub> -TPD(μmol/g) |
|----------|------------------------------|------------|-------|-----------------------------|
|          | Weak                         | Medium     | Total | Total                       |
| LDO-1.4  | 10 (123°C)                   | 39 (344°C) | 49    | 62 (307°C)                  |
| CZA-1.4  | 10 (125°C)                   | 51 (339°C) | 61    | 45 (317°C)                  |

7

8

9
